# Supplementary material for: Sex-specific glioma genome-wide association study identifies new risk locus at 3p21.31 in females, and finds sex-differences in risk at 8q24.21
Source: PubMed Central journal article supplement (PMC5943590; doi:10.1038/s41598-018-24580-z), 2018-05-09

**Sex-specific glioma genome-wide association study identifies new risk locus at 3p21.31 in females, and finds sex-differences in risk at 8q24.21**

Quinn T. Ostrom<sup>1-3</sup>, Ben Kinnersley<sup>4</sup>, Margaret R. Wrensch<sup>5</sup>, Jeanette E. Eckel-Passow<sup>6</sup>, Georgina Armstrong<sup>1</sup>, Terri Rice<sup>5</sup>, Yanwen Chen<sup>2</sup>, John K. Wiencke<sup>5</sup>, Lucie S. McCoy<sup>5</sup>, Helen M. Hansen<sup>5</sup>, Christopher I. Amos<sup>7</sup>, Jonine L. Bernstein<sup>8</sup>, Elizabeth B. Claus<sup>9,10</sup>, Dora Il'yasova<sup>11-13</sup>, Christoffer Johansen<sup>14</sup>, Daniel H. Lachance<sup>15</sup>, Rose K. Lai<sup>16,17</sup>, Ryan T. Merrell<sup>18</sup>, Sara H. Olson<sup>8</sup>, Siegal Sadetzki<sup>19,20</sup>, Joellen M. Schildkraut<sup>21</sup>, Sanjay Shete<sup>22</sup>, Joshua B. Rubin<sup>23</sup>, Justin D. Lathia<sup>24</sup>, Michael E. Berens<sup>25</sup>, Ulrika Andersson<sup>26</sup>, Preetha Rajaraman<sup>27</sup>, Stephen J. Chanock<sup>27,28</sup>, Martha S. Linet<sup>27</sup>, Zhaoming Wang<sup>27,28</sup>, Meredith Yeager<sup>27,28</sup> (on behalf of the GliomaScan consortium<sup>^</sup>), Richard S. Houlston<sup>4</sup>, Robert B. Jenkins<sup>29</sup>, Beatrice Melin<sup>26</sup>, Melissa L. Bondy<sup>1</sup>, Jill. S. Barnholtz-Sloan<sup>2</sup>

1. Department of Medicine, Section of Epidemiology and Population Sciences, Dan L. Duncan Comprehensive Cancer Center, Baylor College of Medicine, Houston, Texas, United States of America.
2. Case Comprehensive Cancer Center, Case Western Reserve University School of Medicine, Cleveland, Ohio, United States of America.
3. Department of Population and Quantitative Health Sciences, Case Western Reserve University School of Medicine, Cleveland, Ohio, United States of America.
4. Division of Genetics and Epidemiology, The Institute of Cancer Research, Sutton, Surrey, United Kingdom.
5. Department of Neurological Surgery and Institute of Human Genetics, School of Medicine, University of California, San Francisco, San Francisco, California, United States of America.
6. Division of Biomedical Statistics and Informatics, Mayo Clinic College of Medicine, Rochester, Minnesota, United States of America.
7. Institute for Clinical and Translational Research, Dan L. Duncan Comprehensive Cancer Center, Baylor College of Medicine, Houston, Texas, United States of America.
8. Department of Epidemiology and Biostatistics, Memorial Sloan Kettering Cancer Center, New York, New York, United States of America.
9. School of Public Health, Yale University, New Haven, Connecticut, United States of America.
10. Department of Neurosurgery, Brigham and Women's Hospital, Boston, Massachusetts, United States of America.
11. Department of Epidemiology and Biostatistics, School of Public Health, Georgia State University, Atlanta, Georgia, United States of America.
12. Cancer Control and Prevention Program, Department of Community and Family Medicine, Duke University Medical Center, Durham, North Carolina, United States of America.
13. Duke Cancer Institute, Duke University Medical Center, Durham, North Carolina, United States of America.
14. Oncology clinic, Finsen Center, Rigshospitalet and Survivorship Research Unit, The Danish Cancer Society Research Center, Copenhagen, Denmark
15. Department of Neurology, Mayo Clinic Comprehensive Cancer Center, Mayo Clinic, Rochester, Minnesota, United States of America.
16. Department of Neurology, Keck School of Medicine, University of Southern California, Los Angeles, California, United States of America.
17. Department of Preventive Medicine, Keck School of Medicine, University of Southern California, Los Angeles, California, United States of America.
18. Department of Neurology, NorthShore University HealthSystem, Evanston, Illinois, United States of America.
19. Cancer and Radiation Epidemiology Unit, Gertner Institute, Chaim Sheba Medical Center, Tel Hashomer, Israel.
20. Department of Epidemiology and Preventive Medicine, School of Public Health, Sackler Faculty of Medicine, Tel-Aviv University, Tel-Aviv, Israel.
21. Department of Public Health Sciences, University of Virginia School of Medicine, Charlottesville, Virginia, United States of America.
22. Department of Biostatistics, University of Texas MD Anderson Cancer Center, Houston, Texas, United States of America.
23. Department of Pediatrics, Washington University School of Medicine, St. Louis, Missouri; Department of Neuroscience, Washington University School of Medicine, St. Louis, Missouri, United States of America.
24. Department of Stem Cell Biology and Regenerative Medicine, Cleveland Clinic Foundation, Cleveland, Ohio, United States of America.
25. Cancer and Cell Biology Division, The Translational Genomics Research Institute, Phoenix, Arizona, United States of America.
26. Department of Radiation Sciences, Faculty of Medicine, Umeå University, Umeå, Sweden
27. Division of Cancer Epidemiology and Genetics, National Cancer Institute, Rockville, Maryland, United States of America.
28. Core Genotyping Facility, National Cancer Institute, SAIC-Frederick, Inc, Gaithersburg, Maryland, United States of America.
29. Department of Laboratory Medicine and Pathology, Mayo Clinic Comprehensive Cancer Center, Mayo Clinic, Rochester, Minnesota, United States of America.

## Supplementary Materials

Supplemental Table 1. Case-only odds ratios (OR), 95% confidence intervals (95% CI), and p values from meta-analysis and individual studies for rs11979158, rs55705857 and rs9841110 overall and by histology groupings.

Supplemental Table 2. Characteristics of individuals in The Cancer Genome Atlas, by study and sex.

Supplemental Table 3. Linkage disequilibrium measures, sex-stratified odds ratios, and 95% confidence intervals (95% CI), and p values from meta-analysis for marker SNPs selected within the Cancer Genome Atlas genotyping data .

Supplemental Table 4. Odds ratios and 95% confidence intervals for unweighted scores in all glioma, GBM, and non-GBM overall and by sex.

Supplemental Table 5. Info score, sex-specific odds ratios (OR), 95% confidence intervals (95% CI), and p values from meta-analysis and individual studies for rs11979158, rs55705857 and rs9841110 overall and by histology groupings.

Supplemental Table 6. Risk allele frequencies (RAF), for meta-analysis and individual studies for rs11979158, rs55705857 and rs9841110 overall and by histology groupings.

Supplemental Table 7. Info score, sex-specific odds ratios (OR), 95% confidence intervals (95% CI), and p values from meta-analysis and individual studies for rs11979158, rs55705857 and rs9841110 by specific non-GBM histologies.

Supplemental Figure 1. P values of SNPs between 48.8mb and 50mb on chromosome 3 in males for A) all glioma, B) GBM, and C) non-GBM, and in females for D) all glioma, E) GBM, and F) non-GBM

Supplemental Figure 2. Proportion of samples with *IDH1/2* mutation in the TCGA GBM and LGG datasets by sex, overall and stratified by study

Supplemental Figure 3. Proportion of samples by glioma subtype (based on *IDH1/2* mutation, 1p19q, and *TERT* mutation) in the TCGA GBM and LGG datasets by sex, overall and stratified by study

Supplemental Figure 4. Proportion of samples by pan-glioma methylation subgroups [23] in the TCGA GBM and LGG datasets by sex, overall and stratified by study

Supplemental Figure 5. Density of histology-specific unweighted risk score by sex and case/control status for A) URS in all glioma, B) URS in GBM, C) URS in non-GBM, D) URS-GBM in GBM, only and E) URS-NGBM in non-GBM only

Supplemental Figure 6. Sex-specific odds ratios and 95% CI from meta-analysis and by study for rs11979158 (7p11.2) for all glioma, GBM, and non-GBM

Supplemental Figure 7. Sex-specific odds ratios and 95% CI from meta-analysis and by study for rs55705857 (8q24.21) for all glioma, GBM, and non-GBM

Supplemental Figure 8. Sex-specific odds ratios and 95% CI from meta-analysis and by study for rs9841110 (3p21.31) for all glioma, GBM, and non-GBM

**Supplemental Table 1. Case-only odds ratios (OR), 95% confidence intervals (95% CI), and p values from meta-analysis and individual studies for rs11979158, rs55705857 and rs9841110 overall and by histology groupings.**

| RSID (Locus)         | Study         | All Glioma |                  |                  | GBM    |                  |                  | Non-GBM |                  |                  |
|----------------------|---------------|------------|------------------|------------------|--------|------------------|------------------|---------|------------------|------------------|
|                      |               | P          | OR (95% CI)      | P <sub>het</sub> | P      | OR (95% CI)      | P <sub>het</sub> | P       | OR (95% CI)      | P <sub>het</sub> |
| rs9841110 (3p21.31)  | Meta-analysis | 0.0520     | 0.93 (0.87-1.00) | 0.2801           | 0.0428 | 0.91 (0.82-1.00) | 0.3218           | 0.5709  | 0.97 (0.86-1.08) | 0.7404           |
|                      | GICC          | 0.2862     | 0.95 (0.87-1.04) | --               | 0.1032 | 0.90 (0.79-1.02) | --               | 0.9061  | 0.99 (0.86-1.14) | --               |
|                      | SFAGS-GWAS    | 0.8498     | 0.98 (0.76-1.25) | --               | 0.5560 | 0.92 (0.69-1.22) | --               | 0.5600  | 1.17 (0.69-1.97) | --               |
|                      | MDA-GWAS      | 0.8190     | 1.02 (0.84-1.24) | --               | 0.4452 | 1.11 (0.85-1.43) | --               | 0.5710  | 0.92 (0.68-1.23) | --               |
|                      | Gliomascan    | 0.0115     | 0.82 (0.71-0.96) | --               | 0.0453 | 0.81 (0.65-1.00) | --               | 0.3430  | 0.87 (0.66-1.16) | --               |
| rs11979158 (7p11.2)  | Meta-analysis | 0.0071     | 1.13 (1.03-1.24) | 0.8834           | 0.2392 | 1.08 (0.95-1.22) | 0.8130           | 0.0115  | 1.20 (1.04-1.39) | 0.2339           |
|                      | GICC          | 0.0924     | 1.11 (0.98-1.25) | --               | 0.5852 | 1.05 (0.88-1.24) | --               | 0.0764  | 1.18 (0.98-1.41) | --               |
|                      | SFAGS-GWAS    | 0.4149     | 1.15 (0.82-1.62) | --               | 0.9093 | 1.02 (0.69-1.52) | --               | 0.1465  | 1.67 (0.84-3.33) | --               |
|                      | MDA-GWAS      | 0.0820     | 1.24 (0.97-1.57) | --               | 0.8085 | 1.04 (0.75-1.45) | --               | 0.0214  | 1.5 (1.06-2.13)  | --               |
|                      | Gliomascan    | 0.2396     | 1.12 (0.93-1.36) | --               | 0.1607 | 1.22 (0.93-1.60) | --               | 0.7295  | 0.94 (0.65-1.35) | --               |
| rs55705857 (8q24.21) | Meta-analysis | 0.0012     | 1.20 (1.07-1.33) | 0.0523           | 0.6513 | 1.04 (0.88-1.23) | 0.1497           | 0.0084  | 1.23 (1.05-1.43) | 0.0968           |
|                      | GICC          | 0.0293     | 1.17 (1.02-1.34) | --               | 0.3163 | 0.89 (0.71-1.12) | --               | 0.0236  | 1.24 (1.03-1.49) | --               |
|                      | SFAGS-GWAS    | 0.0522     | 1.56 (1.00-2.44) | --               | 0.2701 | 1.35 (0.79-2.32) | --               | 0.0573  | 2.23 (0.98-5.11) | --               |
|                      | MDA-GWAS      | 0.4549     | 0.89 (0.66-1.21) | --               | 0.9869 | 1.00 (0.63-1.58) | --               | 0.3932  | 0.83 (0.55-1.27) | --               |
|                      | Gliomascan    | 0.0024     | 1.47 (1.15-1.88) | --               | 0.0691 | 1.40 (0.97-2.02) | --               | 0.0511  | 1.53 (1.00-2.34) | --               |

Abbreviations: GICC: Glioma International Case-Control Study; SFAGS-GWAS: San Francisco Adult Glioma Study GWAS; MDA-GWAS: MD Anderson GWAS

**Supplemental Table 2. Characteristics of individuals in The Cancer Genome Atlas, by study and sex**

| <b>Characteristic</b>      | <b>Overall</b> | <b>Males</b>  | <b>Females</b> |
|----------------------------|----------------|---------------|----------------|
| <b>N</b>                   | 786            | 458           | 328            |
| GBM (% of total)           | 356 (45.3%)    | 221 (48.3%)   | 135 (41.2%)    |
| Non-GBM (% of total)       | 430 (54.7%)    | 237 (51.7%)   | 193 (58.8%)    |
| Mean Age (SD)              | 50.74 (15.55)  | 51.21 (15.59) | 50.11 (15.49)  |
| GBM - Mean Age (SD)        | 59.83 (12.89)  | 60.16 (12.33) | 59.29 (13.79)  |
| Non-GBM - Mean Age (SD)    | 43.23 (13.40)  | 42.85 (13.54) | 43.69 (13.24)  |
| IDH wild type (% of total) | 373 (50.3%)    | 229 (52.8%)   | 144 (46.8%)    |
| GBM (% of total)           | 297 (94.3%)    | 187 (94.0%)   | 110 (94.8%)    |
| Non-GBM (% of total)       | 76 (17.8%)     | 42 (17.9%)    | 34 (17.7%)     |
| IDH mutant (% of total)    | 369 (49.7%)    | 205 (47.2%)   | 164 (53.2%)    |
| GBM (% of total)           | 18 (5.7%)      | 12 (6.0%)     | 6 (5.2%)       |
| Non-GBM (% of total)       | 351 (82.2%)    | 193 (82.1%)   | 158 (82.3%)    |

**Supplemental Table 3. Linkage disequilibrium measures, sex-stratified odds ratios, and 95% confidence intervals (95% CI), and p values from meta-analysis for marker SNPs selected within the Cancer Genome Atlas genotyping data**

| RSID (Locus)<br>[Risk Allele]             | Marker SNP                                              |             | Histology  | Results from Sex-Stratified 4 study meta-analysis |                          |                       |                          |                |
|-------------------------------------------|---------------------------------------------------------|-------------|------------|---------------------------------------------------|--------------------------|-----------------------|--------------------------|----------------|
|                                           | RSID [LD (CEU <sup>a</sup> )]                           | Risk Allele |            | P <sub>M</sub>                                    | OR <sub>M</sub> (95% CI) | P <sub>F</sub>        | OR <sub>F</sub> (95% CI) | p <sub>D</sub> |
| rs9841110<br>(3p21.31)<br>[ <u>C</u> /G]  | rs9814873<br>[D'=1; r <sup>2</sup> =1<br>(C=A,G=G)]     | <u>A</u> /G | All glioma | 0.6552                                            | 1.01 (0.95-1.08)         | 1.45x10 <sup>-7</sup> | 1.22 (1.13-1.31)         | 0.0002         |
|                                           |                                                         |             | GBM        | 0.4139                                            | 1.03 (0.96-1.11)         | 1.98x10 <sup>-7</sup> | 1.26 (1.16-1.38)         | 0.0005         |
|                                           |                                                         |             | Non-GBM    | 0.4526                                            | 0.97 (0.89-1.06)         | 0.0279                | 1.12 (1.01-1.23)         | 0.0259         |
| rs11979158<br>(7p11.2)<br>[ <u>A</u> /G]  | rs7785013<br>[D'=1; r <sup>2</sup> =1<br>(A=G,G=A)]     | <u>G</u> /A | All glioma | 1.87x10 <sup>-12</sup>                            | 1.34 (1.23-1.45)         | 0.0168                | 1.12 (1.02-1.23)         | 0.0046         |
|                                           |                                                         |             | GBM        | 4.62x10 <sup>-13</sup>                            | 1.41 (1.29-1.55)         | 1.11x10 <sup>-4</sup> | 1.25 (1.12-1.39)         | 0.1073         |
|                                           |                                                         |             | Non-GBM    | 2.18x10 <sup>-5</sup>                             | 1.27 (1.14-1.42)         | 0.9088                | 0.99 (0.88-1.12)         | 0.0031         |
| rs55705857<br>(8q24.21)<br>[A/ <u>G</u> ] | rs4636162<br>[D'=1; r <sup>2</sup> =0.104<br>(A=G,G=A)] | G/ <u>A</u> | All glioma | 0.0158                                            | 1.08 (1.01-1.15)         | 0.0018                | 1.12 (1.04-1.20)         | 0.4271         |
|                                           |                                                         |             | GBM        | 0.6525                                            | 1.02 (0.95-1.09)         | 0.9398                | 1.00 (0.92-1.09)         | 0.8347         |
|                                           |                                                         |             | Non-GBM    | 1.37x10 <sup>-5</sup>                             | 1.21 (1.11-1.32)         | 6.07x10 <sup>-8</sup> | 1.31 (1.19-1.45)         | 0.2134         |

a. As estimated using LD link (<https://analysistools.nci.nih.gov/LDlink/>)

**Supplemental Table 4. Odds ratios and 95% confidence intervals for unweighted scores in all glioma, GBM, and non-GBM overall and by sex.**

| Histology group (Score)          | Number of risk alleles | Males       |               |                                |                               | Females     |               |                                |                               |
|----------------------------------|------------------------|-------------|---------------|--------------------------------|-------------------------------|-------------|---------------|--------------------------------|-------------------------------|
|                                  |                        | Cases (%)   | Controls (%)  | OR (95% CI)                    | P                             | Cases (%)   | Controls (%)  | OR (95% CI)                    | P                             |
| All glioma (URS <sup>a</sup> )   | 0-5                    | 46 (1.2%)   | 161 (4.3%)    | 0.24 (0.17-0.34)               | 1.96x10 <sup>-15</sup>        | 30 (1.2%)   | 175 (4.7%)    | 0.19 (0.13-0.28)               | 1.52x10 <sup>-15</sup>        |
|                                  | 6                      | 140 (3.7%)  | 286 (7.6%)    | 0.38 (0.30-0.48)               | 6.20x10 <sup>-16</sup>        | 105 (4.1%)  | 307 (8.3%)    | 0.38 (0.30-0.49)               | 1.10x10 <sup>-13</sup>        |
|                                  | 7                      | 411 (10.9%) | 575 (15.3%)   | 0.56 (0.48-0.67)               | 3.33x10 <sup>-11</sup>        | 249 (9.7%)  | 597 (16.1%)   | 0.46 (0.38-0.56)               | 1.09x10 <sup>-15</sup>        |
|                                  | 8                      | 639 (17.0%) | 815 (21.6%)   | 0.61 (0.52-0.71)               | 2.04x10 <sup>-10</sup>        | 457 (17.8%) | 818 (22.1%)   | 0.63 (0.54-0.74)               | 3.45 x10 <sup>-8</sup>        |
|                                  | 9                      | 830 (22.1%) | 826 (21.9%)   | 0.79 (0.68-0.91)               | 1.60x10 <sup>-3</sup>         | 557 (21.7%) | 795 (21.4%)   | 0.79 (0.67-0.92)               | 3.33 x10 <sup>-3</sup>        |
|                                  | 10                     | 768 (20.4%) | 621 (16.5%)   | Ref                            | --                            | 556 (21.7%) | 621 (16.8%)   | Ref                            | --                            |
|                                  | 11                     | 543 (14.4%) | 615 (16.3%)   | 1.33 (1.11-1.59)               | 1.82x10 <sup>-3</sup>         | 351 (13.7%) | 292 (7.9%)    | 1.35 (1.11-1.65)               | 2.35 x10 <sup>-3</sup>        |
|                                  | 12                     | 247 (6.6%)  | 121 (3.2%)    | 1.71 (1.34-2.18)               | 1.62x10 <sup>-5</sup>         | 189 (7.4%)  | 82 (2.2%)     | 2.53 (1.91-3.39)               | 1.91 x10 <sup>-10</sup>       |
|                                  | 13-16                  | 110 (2.9%)  | 47 (1.2%)     | 1.74 (1.21-2.53)               | 3.06x10 <sup>-3</sup>         | 70 (2.7%)   | 20 (0.5%)     | 3.97 (2.42-6.80)               | 1.42 x10 <sup>-7</sup>        |
|                                  | Total                  | 3,761       | 3,767         | 1.26 (1.23-1.30)<br>per allele | Trend: 8.74x10 <sup>-63</sup> | 2564        | 3707          | 1.34 (1.30-1.38)<br>per allele | Trend: 3.17x10 <sup>-74</sup> |
| GBM (URS-GBM <sup>b</sup> )      | 0-2                    | 28 (1.2%)   | 181 (4.4%)    | 0.21 (0.14-0.31)               | 1.10x10 <sup>-13</sup>        | 20 (1.4%)   | 181 (4.4%)    | 0.25 (0.15-0.39)               | 1.02x10 <sup>-8</sup>         |
|                                  | 3                      | 128 (5.3%)  | 439 (10.6%)   | 0.39 (0.31-0.48)               | 2.84x10 <sup>-17</sup>        | 77 (5.3%)   | 485 (11.7%)   | 0.35 (0.27-0.46)               | 2.77x10 <sup>-14</sup>        |
|                                  | 4                      | 347 (14.4%) | 945 (22.7%)   | 0.49 (0.42-0.58)               | 2.23x10 <sup>-18</sup>        | 217 (15.0%) | 954 (23.0%)   | 0.51 (0.42-0.61)               | 2.21x10 <sup>-12</sup>        |
|                                  | 5                      | 631 (26.2%) | 1,156 (27.8%) | 0.73 (0.64-0.84)               | 1.11x10 <sup>-5</sup>         | 356 (24.7%) | 1,181 (28.5%) | 0.67 (0.57-0.80)               | 3.88x10 <sup>-6</sup>         |
|                                  | 6                      | 684 (28.4%) | 920 (22.1%)   | Ref                            | --                            | 393 (27.3%) | 877 (21.2%)   | Ref                            | --                            |
|                                  | 7                      | 430 (17.9%) | 396 (9.5%)    | 1.46 (1.24-1.73)               | 9.58x10 <sup>-6</sup>         | 272 (18.9%) | 374 (9.0%)    | 1.62 (1.33-1.97)               | 1.54x10 <sup>-6</sup>         |
|                                  | 8-11                   | 159 (6.6%)  | 120 (2.9%)    | 1.79 (1.38-2.32)               | 9.47x10 <sup>-6</sup>         | 107 (7.4%)  | 88 (2.1%)     | 2.69 (1.98-3.66)               | 2.32x10 <sup>-10</sup>        |
|                                  | Total                  | 2,407       | 4,157         | 1.40 (1.35-1.46)<br>per allele | Trend: 2.05x10 <sup>-66</sup> | 1442        | 4140          | 1.47 (1.40-1.54)<br>per allele | Trend: 3.76x10 <sup>-60</sup> |
| non-GBM (URS-NGBM <sup>c</sup> ) | 0-1                    | 59 (4.2%)   | 341 (8.8%)    | 0.41 (0.29-0.56)               | 5.49x10 <sup>-8</sup>         | 34 (3.1%)   | 346 (9.1%)    | 0.30 (0.20-0.44)               | 1.09x10 <sup>-9</sup>         |
|                                  | 2                      | 130 (9.2%)  | 715 (18.5%)   | 0.40 (0.32-0.51)               | 1.06x10 <sup>-13</sup>        | 129 (11.6%) | 756 (19.9%)   | 0.55 (0.43-0.70)               | 9.97x10 <sup>-7</sup>         |
|                                  | 3                      | 340 (24.1%) | 1,089 (28.2%) | 0.76 (0.64-0.92)               | 4.06x10 <sup>-3</sup>         | 263 (23.7%) | 1,145 (30.2%) | 0.72 (0.59-0.88)               | 1.25x10 <sup>-3</sup>         |
|                                  | 4                      | 419 (29.7%) | 979 (25.4%)   | Ref                            | --                            | 298 (26.8%) | 921 (24.3%)   | Ref                            | --                            |
|                                  | 5                      | 288 (20.4%) | 523 (13.5%)   | 1.28 (1.05-1.57)               | 1.65x10 <sup>-2</sup>         | 251 (22.6%) | 477 (12.6%)   | 1.71 (1.38-2.12)               | 1.08x10 <sup>-6</sup>         |
|                                  | 6-11                   | 175 (12.4%) | 213 (5.5%)    | 1.70 (1.31-2.19)               | 5.19x10 <sup>-5</sup>         | 137 (12.3%) | 146 (3.9%)    | 2.83 (2.12-3.78)               | 1.41x10 <sup>-12</sup>        |
|                                  | Total                  | 1,411       | 3,860         | 1.36 (1.29-1.42)<br>per allele | Trend: 1.16x10 <sup>-32</sup> | 1,112       | 3,791         | 1.49 (1.41-1.58)<br>per allele | Trend: 2.59x10 <sup>-45</sup> |

a. model includes age, and sum of risk alleles for rs12752552, rs9841110, rs10069690, rs11979158, rs55705857, rs634537, rs12803321, rs3751667, rs78378222, and rs2297440. Reference is 10 alleles.

b. model includes age and sum of risk alleles for rs9841110, rs10069690, rs11979158, rs634537, rs78378222, and rs2297440. Reference is 6 alleles.

c. model includes age and sum of risk alleles for rs10069690, rs55705857, rs634537, rs12803321, rs78378222, and rs2297440. Reference is 4 alleles.

**Supplemental Table 5. Info score, sex-specific odds ratios (OR), 95% confidence intervals (95% CI), and p values from meta-analysis and individual studies for rs11979158, rs55705857 and rs9841110 overall and by histology groupings.**

| RSID                    | Risk Allele   | Histology              | Study         | Males             |                        |                          |                        | Females           |                        |                          |                        | Sex Difference        |                  |                       |        |
|-------------------------|---------------|------------------------|---------------|-------------------|------------------------|--------------------------|------------------------|-------------------|------------------------|--------------------------|------------------------|-----------------------|------------------|-----------------------|--------|
|                         |               |                        |               | Info <sub>M</sub> | P <sub>M</sub>         | OR <sub>M</sub> (95% CI) | P <sub>het</sub>       | Info <sub>F</sub> | P <sub>F</sub>         | OR <sub>F</sub> (95% CI) | P <sub>het</sub>       | P <sub>D</sub>        | P <sub>het</sub> |                       |        |
| rs9841110<br>(3p21.31)  | C/G           | All glioma             | Meta-analysis |                   | 0.5885                 | 1.02 (0.96-1.08)         | 0.0728                 |                   | 5.55x10 <sup>-8</sup>  | 1.22 (1.14-1.32)         | 0.2751                 | 1.77x10 <sup>-4</sup> | 0.6269           |                       |        |
|                         |               |                        | GICC          | 1.00              | 0.3089                 | 0.95 (0.87-1.05)         |                        | 1.00              | 0.0123                 | 1.15 (1.03-1.28)         |                        | 0.0052                |                  |                       |        |
|                         |               |                        | SFAGS-GWAS    | 1.00              | 0.016                  | 1.25 (1.04-1.49)         |                        | 1.00              | 0.0059                 | 1.35 (1.09-1.67)         |                        | 0.2857                |                  |                       |        |
|                         |               |                        | MDA-GWAS      | 1.00              | 0.5538                 | 1.05 (0.90-1.22)         |                        | 1.00              | 0.0621                 | 1.18 (0.99-1.40)         |                        | 0.1586                |                  |                       |        |
|                         |               | GBM                    | Meta-analysis |                   | 0.3429                 | 1.04 (0.96-1.11)         | 0.1308                 |                   | 1.44x10 <sup>-7</sup>  | 1.27 (1.16-1.38)         | 0.2649                 | 6.04x10 <sup>-4</sup> | 0.633            |                       |        |
|                         |               |                        | GICC          | 1.00              | 0.5104                 | 0.97 (0.87-1.07)         |                        | 1.00              | 0.0027                 | 1.22 (1.07-1.39)         |                        | 0.003                 |                  |                       |        |
|                         |               |                        | SFAGS-GWAS    | 1.00              | 0.021                  | 1.26 (1.04-1.53)         |                        | 1.00              | 0.0025                 | 1.45 (1.14-1.85)         |                        | 0.184                 |                  |                       |        |
|                         |               |                        | MDA-GWAS      | 1.00              | 0.5797                 | 1.05 (0.88-1.27)         |                        | 1.00              | 0.3271                 | 1.11 (0.90-1.37)         |                        | 0.3565                |                  |                       |        |
|                         |               | Non-GBM                | Meta-analysis |                   | 0.4816                 | 0.97 (0.89-1.06)         | 0.3776                 |                   | 0.016                  | 1.13 (1.02-1.24)         | 0.5611                 | 0.0186                | 0.7033           |                       |        |
|                         |               |                        | GICC          | 1.00              | 0.1834                 | 0.92 (0.82-1.04)         |                        | 1.00              | 0.342                  | 1.07 (0.94-1.21)         |                        | 0.0547                |                  |                       |        |
|                         |               |                        | SFAGS-GWAS    | 1.00              | 0.2235                 | 1.21 (0.89-1.65)         |                        | 1.00              | 0.619                  | 1.10 (0.75-1.64)         |                        | 0.3596                |                  |                       |        |
|                         |               |                        | MDA-GWAS      | 1.00              | 0.7644                 | 1.03 (0.85-1.26)         |                        | 1.00              | 0.0567                 | 1.26 (0.99-1.60)         |                        | 0.1014                |                  |                       |        |
|                         |               | rs11979158<br>(7p11.2) | A/G           | All glioma        | Meta-analysis          |                          | 4.87x10 <sup>-12</sup> | 1.33 (1.23-1.44)  | 0.1316                 |                          | 0.0187                 | 1.12 (1.02-1.22)      | 0.772            | 0.0055                | 0.2849 |
|                         |               |                        |               |                   | GICC                   | 1.00                     | 2.94x10 <sup>-10</sup> | 1.47 (1.30-1.66)  |                        | 1.00                     | 0.1528                 | 1.11 (0.96-1.27)      |                  | 0.0013                |        |
|                         |               |                        |               |                   | SFAGS-GWAS             | 1.00                     | 0.0256                 | 1.32 (1.03-1.68)  |                        | 1.00                     | 0.2579                 | 1.17 (0.89-1.54)      |                  | 0.2631                |        |
|                         |               |                        |               |                   | MDA-GWAS               | 1.00                     | 0.019                  | 1.25 (1.04-1.51)  |                        | 1.00                     | 0.8186                 | 1.02 (0.83-1.26)      |                  | 0.0812                |        |
| GBM                     | Meta-analysis |                        |               |                   | 1.26x10 <sup>-12</sup> | 1.40 (1.28-1.54)         | 0.4644                 |                   | 1.33x10 <sup>-4</sup>  | 1.24 (1.11-1.39)         | 0.9652                 | 0.1184                | 0.6473           |                       |        |
|                         | GICC          |                        |               | 1.00              | 1.14x10 <sup>-9</sup>  | 1.52 (1.33-1.73)         |                        | 1.00              | 0.0254                 | 1.22 (1.02-1.44)         |                        | 0.0229                |                  |                       |        |
|                         | SFAGS-GWAS    |                        |               | 1.00              | 0.0349                 | 1.33 (1.02-1.73)         |                        | 1.00              | 0.0784                 | 1.32 (0.97-1.79)         |                        | 0.484                 |                  |                       |        |
|                         | MDA-GWAS      |                        |               | 1.00              | 0.0371                 | 1.27 (1.01-1.59)         |                        | 1.00              | 0.1382                 | 1.22 (0.94-1.59)         |                        | 0.4067                |                  |                       |        |
| Non-GBM                 | Meta-analysis |                        |               |                   | 2.74x10 <sup>-5</sup>  | 1.27 (1.13-1.41)         | 0.3829                 |                   | 0.9014                 | 0.99 (0.88-1.12)         | 0.1587                 | 0.0034                | 0.1072           |                       |        |
|                         | GICC          |                        |               | 1.00              | 3.48x10 <sup>-5</sup>  | 1.37 (1.18-1.60)         |                        | 1.00              | 0.8557                 | 0.98 (0.83-1.16)         |                        | 0.0018                |                  |                       |        |
|                         | SFAGS-GWAS    |                        |               | 1.00              | 0.3373                 | 1.22 (0.82-1.82)         |                        | 1.00              | 0.5226                 | 0.85 (0.52-1.40)         |                        | 0.1358                |                  |                       |        |
|                         | MDA-GWAS      |                        |               | 1.00              | 0.1229                 | 1.21 (0.95-1.54)         |                        | 1.00              | 0.1696                 | 0.82 (0.61-1.09)         |                        | 0.0205                |                  |                       |        |
| rs55705857<br>(8q24.21) | A/G           |                        |               | All glioma        | Meta-analysis          |                          | 1.09x10 <sup>-14</sup> | 1.56 (1.40-1.75)  | 0.0426                 |                          | 1.22x10 <sup>-39</sup> | 2.45 (2.14-2.80)      | 0.6289           | 0                     | 0.0662 |
|                         |               |                        |               |                   | GICC                   | 1.00                     | 1.19x10 <sup>-10</sup> | 1.68 (1.43-1.97)  |                        | 1.00                     | 1.63x10 <sup>-19</sup> | 2.30 (1.92-2.76)      |                  | 0.005                 |        |
|                         |               |                        |               |                   | SFAGS-GWAS             | 1.00                     | 0.4872                 | 1.14 (0.78-1.67)  |                        | 1.00                     | 4.16x10 <sup>-6</sup>  | 3.18 (1.94-5.21)      |                  | 6.44x10 <sup>-4</sup> |        |
|                         |               |                        |               |                   | MDA-GWAS               | 1.00                     | 2.67x10 <sup>-6</sup>  | 1.90 (1.46-2.49)  |                        | 1.00                     | 9.89x10 <sup>-7</sup>  | 2.46 (1.72-3.53)      |                  | 0.1315                |        |
|                         |               | GBM                    | Meta-analysis |                   | 0.0344                 | 1.17 (1.01-1.34)         | 0.8709                 |                   | 4.16x10 <sup>-7</sup>  | 1.61 (1.34-1.94)         | 0.0728                 | 0.0066                | 0.0823           |                       |        |
|                         |               |                        | GICC          | 1.00              | 0.051                  | 1.22 (1.00-1.49)         |                        | 1.00              | 0.0612                 | 1.29 (0.99-1.69)         |                        | 0.3702                |                  |                       |        |
|                         |               |                        | SFAGS-GWAS    | 1.00              | 0.6649                 | 1.10 (0.73-1.65)         |                        | 1.00              | 0.0014                 | 2.56 (1.44-4.57)         |                        | 0.0094                |                  |                       |        |
|                         |               |                        | MDA-GWAS      | 1.00              | 0.3057                 | 1.21 (0.84-1.72)         |                        | 1.00              | 0.063                  | 1.56 (0.98-2.48)         |                        | 0.197                 |                  |                       |        |
|                         |               | Non-GBM                | Meta-analysis |                   | 8.13x10 <sup>-36</sup> | 2.66 (2.28-3.10)         | 0.026                  |                   | 1.85x10 <sup>-65</sup> | 4.71 (3.94-5.63)         | 0.0514                 | 3.46x10 <sup>-7</sup> | 0.0662           |                       |        |
|                         |               |                        | GICC          | 1.00              | 6.85x10 <sup>-25</sup> | 2.81 (2.31-3.42)         |                        | 1.00              | 1.42x10 <sup>-39</sup> | 4.09 (3.32-5.05)         |                        | 0.0051                |                  |                       |        |
|                         |               |                        | SFAGS-GWAS    | 1.00              | 0.455                  | 1.31 (0.65-2.66)         |                        | 1.00              | 1.44x10 <sup>-6</sup>  | 12.68 (4.51-35.64)       |                        | 1.89x10 <sup>-4</sup> |                  |                       |        |
|                         |               |                        | MDA-GWAS      | 1.00              | 3.17x10 <sup>-12</sup> | 3.50 (2.46-4.97)         |                        | 1.00              | 2.55x10 <sup>-11</sup> | 6.38 (3.70-11.00)        |                        | 0.0346                |                  |                       |        |

|  |  |            |      |        |                  |  |      |                        |                  |  |                       |
|--|--|------------|------|--------|------------------|--|------|------------------------|------------------|--|-----------------------|
|  |  | Gliomascan | 1.00 | 0.0015 | 1.90 (1.28-2.82) |  | 1.00 | $1.82 \times 10^{-14}$ | 6.17 (3.87-9.83) |  | $7.71 \times 10^{-5}$ |
|--|--|------------|------|--------|------------------|--|------|------------------------|------------------|--|-----------------------|

Abbreviations: GICC: Glioma International Case-Control Study; SFAGS-GWAS: San Francisco Adult Glioma Study GWAS; MDA-GWAS: MD Anderson GWAS



**Supplemental Table 6. Risk allele frequencies (RAF), for meta-analysis and individual studies for rs11979158, rs55705857 and rs9841110 overall and by histology groupings.**

| RSID                                     | Risk Allele   | Histology                                | Study         | Males      |               |          |       | Females |       |          |       |
|------------------------------------------|---------------|------------------------------------------|---------------|------------|---------------|----------|-------|---------|-------|----------|-------|
|                                          |               |                                          |               | Cases      |               | Controls |       | Cases   |       | Controls |       |
|                                          |               |                                          |               | N          | RAF           | N        | RAF   | N       | RAF   | N        | RAF   |
| rs9841110<br>(3p21.31)                   | <u>C/G</u>    | All glioma                               | Meta-analysis | 4,831      | 0.307         | 5,176    | 0.313 | 3,206   | 0.291 | 5,417    | 0.337 |
|                                          |               |                                          | GICC          | 2,733      | 0.311         | 1,868    | 0.312 | 1,831   | 0.299 | 1,397    | 0.337 |
|                                          |               |                                          | SFAGS-GWAS    | 440        | 0.282         | 749      | 0.333 | 237     | 0.270 | 1,618    | 0.343 |
|                                          |               |                                          | MDA-GWAS      | 714        | 0.293         | 1,094    | 0.302 | 429     | 0.296 | 1,142    | 0.335 |
|                                          |               |                                          | Gliomascan    | 944        | 0.318         | 1,465    | 0.311 | 709     | 0.275 | 1,260    | 0.330 |
|                                          |               | GBM                                      | Meta-analysis | 2,835      | 0.304         | 5,176    | 0.313 | 1,682   | 0.283 | 5,417    | 0.337 |
|                                          |               |                                          | GICC          | 1,575      | 0.310         | 1,868    | 0.312 | 885     | 0.287 | 1,397    | 0.337 |
|                                          |               |                                          | SFAGS-GWAS    | 333        | 0.279         | 749      | 0.333 | 178     | 0.253 | 1,618    | 0.343 |
|                                          |               |                                          | MDA-GWAS      | 397        | 0.290         | 1,094    | 0.302 | 246     | 0.307 | 1,142    | 0.335 |
|                                          |               |                                          | Gliomascan    | 530        | 0.313         | 1,465    | 0.311 | 373     | 0.269 | 1,260    | 0.330 |
|                                          |               | Non-GBM                                  | Meta-analysis | 1,716      | 0.312         | 5,176    | 0.313 | 1,320   | 0.306 | 5,417    | 0.337 |
|                                          |               |                                          | GICC          | 1,036      | 0.317         | 1,868    | 0.312 | 862     | 0.314 | 1,397    | 0.337 |
|                                          |               |                                          | SFAGS-GWAS    | 107        | 0.290         | 749      | 0.333 | 59      | 0.322 | 1,618    | 0.343 |
|                                          |               |                                          | MDA-GWAS      | 317        | 0.297         | 1,094    | 0.302 | 183     | 0.281 | 1,142    | 0.335 |
|                                          |               |                                          | Gliomascan    | 256        | 0.325         | 1,465    | 0.311 | 216     | 0.294 | 1,260    | 0.330 |
|                                          |               | Astrocytoma (Non-GBM) (WHO grade II-III) | Meta-analysis | 787        | 0.296         | 4,427    | 0.309 | 585     | 0.300 | 3,799    | 0.334 |
|                                          |               |                                          | GICC          | 494        | 0.299         | 1,868    | 0.312 | 400     | 0.307 | 1,397    | 0.337 |
|                                          |               |                                          | MDA-GWAS      | 155        | 0.274         | 1,094    | 0.302 | 88      | 0.288 | 1,142    | 0.335 |
|                                          |               |                                          | Gliomascan    | 138        | 0.312         | 1,465    | 0.311 | 97      | 0.279 | 1,260    | 0.330 |
|                                          |               | Oligodendroglioma (WHO grade II-III)     | Meta-analysis | 483        | 0.314         | 4,427    | 0.309 | 399     | 0.303 | 3,799    | 0.334 |
|                                          |               |                                          | GICC          | 310        | 0.321         | 1,868    | 0.312 | 266     | 0.312 | 1,397    | 0.337 |
|                                          |               |                                          | MDA-GWAS      | 95         | 0.289         | 1,094    | 0.302 | 54      | 0.241 | 1,142    | 0.335 |
|                                          |               |                                          | Gliomascan    | 78         | 0.314         | 1,465    | 0.311 | 79      | 0.316 | 1,260    | 0.330 |
|                                          |               | rs11979158<br>(7p11.2)                   | <u>A/G</u>    | All glioma | Meta-analysis | 4,831    | 0.136 | 5,176   | 0.170 | 3,206    | 0.153 |
| GICC                                     | 2,733         |                                          |               |            | 0.135         | 1,868    | 0.186 | 1,831   | 0.149 | 1,397    | 0.164 |
| SFAGS-GWAS                               | 440           |                                          |               |            | 0.125         | 749      | 0.154 | 237     | 0.141 | 1,618    | 0.151 |
| MDA-GWAS                                 | 714           |                                          |               |            | 0.137         | 1,094    | 0.166 | 429     | 0.164 | 1,142    | 0.166 |
| Gliomascan                               | 944           |                                          |               |            | 0.146         | 1,465    | 0.163 | 709     | 0.160 | 1,260    | 0.173 |
| GBM                                      | Meta-analysis |                                          |               | 2,835      | 0.128         | 5,176    | 0.170 | 1,682   | 0.139 | 5,417    | 0.163 |
|                                          | GICC          |                                          |               | 1,575      | 0.129         | 1,868    | 0.186 | 885     | 0.135 | 1,397    | 0.164 |
|                                          | SFAGS-GWAS    |                                          |               | 333        | 0.122         | 749      | 0.154 | 178     | 0.126 | 1,618    | 0.151 |
|                                          | MDA-GWAS      |                                          |               | 397        | 0.134         | 1,094    | 0.166 | 246     | 0.140 | 1,142    | 0.166 |
|                                          | Gliomascan    |                                          |               | 530        | 0.128         | 1,465    | 0.163 | 373     | 0.151 | 1,260    | 0.173 |
| Non-GBM                                  | Meta-analysis |                                          |               | 1,716      | 0.145         | 5,176    | 0.170 | 1,320   | 0.167 | 5,417    | 0.163 |
|                                          | GICC          |                                          |               | 1,036      | 0.142         | 1,868    | 0.186 | 862     | 0.164 | 1,397    | 0.164 |
|                                          | SFAGS-GWAS    |                                          |               | 107        | 0.136         | 749      | 0.154 | 59      | 0.186 | 1,618    | 0.151 |
|                                          | MDA-GWAS      |                                          |               | 317        | 0.140         | 1,094    | 0.166 | 183     | 0.197 | 1,142    | 0.166 |
|                                          | Gliomascan    |                                          |               | 256        | 0.162         | 1,465    | 0.163 | 216     | 0.150 | 1,260    | 0.173 |
| Astrocytoma (Non-GBM) (WHO grade II-III) | Meta-analysis |                                          |               | 787        | 0.134         | 4,427    | 0.066 | 585     | 0.136 | 3,799    | 0.057 |
|                                          | GICC          |                                          |               | 494        | 0.142         | 1,868    | 0.059 | 400     | 0.133 | 1,397    | 0.051 |
|                                          | MDA-GWAS      |                                          |               | 155        | 0.131         | 1,094    | 0.070 | 88      | 0.141 | 1,142    | 0.059 |
|                                          | Gliomascan    |                                          |               | 138        | 0.107         | 1,465    | 0.073 | 97      | 0.148 | 1,260    | 0.061 |
| Oligodendroglioma (WHO grade II-III)     | Meta-analysis |                                          |               | 483        | 0.168         | 4,427    | 0.066 | 399     | 0.207 | 3,799    | 0.057 |
|                                          | GICC          |                                          |               | 310        | 0.168         | 1,868    | 0.059 | 266     | 0.224 | 1,397    | 0.051 |
|                                          | MDA-GWAS      |                                          |               | 95         | 0.196         | 1,094    | 0.070 | 54      | 0.146 | 1,142    | 0.059 |
|                                          | Gliomascan    |                                          |               | 78         | 0.132         | 1,465    | 0.073 | 79      | 0.194 | 1,260    | 0.061 |
| rs55705857<br>(8q24.21)                  | <u>A/G</u>    |                                          |               | All glioma | Meta-analysis | 4,831    | 0.096 | 5,176   | 0.066 | 3,206    | 0.112 |
|                                          |               | GICC                                     | 2,733         |            | 0.097         | 1,868    | 0.059 | 1,831   | 0.113 | 1,397    | 0.051 |
|                                          |               | SFAGS-GWAS                               | 440           |            | 0.070         | 749      | 0.063 | 237     | 0.096 | 1,618    | 0.050 |
|                                          |               | MDA-GWAS                                 | 714           |            | 0.113         | 1,094    | 0.070 | 429     | 0.106 | 1,142    | 0.059 |
|                                          |               | Gliomascan                               | 944           |            | 0.092         | 1,465    | 0.073 | 709     | 0.120 | 1,260    | 0.061 |
|                                          |               | GBM                                      | Meta-analysis | 2,835      | 0.072         | 5,176    | 0.066 | 1,682   | 0.075 | 5,417    | 0.055 |
|                                          |               |                                          | GICC          | 1,575      | 0.069         | 1,868    | 0.059 | 885     | 0.062 | 1,397    | 0.051 |
|                                          |               |                                          | SFAGS-GWAS    | 333        | 0.068         | 749      | 0.063 | 178     | 0.085 | 1,618    | 0.050 |
|                                          |               |                                          | MDA-GWAS      | 397        | 0.080         | 1,094    | 0.070 | 246     | 0.081 | 1,142    | 0.059 |
|                                          |               |                                          | Gliomascan    | 530        | 0.078         | 1,465    | 0.073 | 373     | 0.100 | 1,260    | 0.061 |
|                                          |               | Non-GBM                                  | Meta-analysis | 1,716      | 0.135         | 5,176    | 0.066 | 1,320   | 0.159 | 5,417    | 0.055 |
|                                          |               |                                          | GICC          | 1,036      | 0.140         | 1,868    | 0.059 | 862     | 0.168 | 1,397    | 0.051 |
|                                          |               |                                          | SFAGS-GWAS    | 107        | 0.073         | 749      | 0.063 | 59      | 0.130 | 1,618    | 0.050 |
|                                          |               |                                          | MDA-GWAS      | 317        | 0.154         | 1,094    | 0.070 | 183     | 0.139 | 1,142    | 0.059 |
|                                          |               |                                          | Gliomascan    | 256        | 0.116         | 1,465    | 0.073 | 216     | 0.152 | 1,260    | 0.061 |

|  |                                          |               |     |       |       |       |     |       |       |       |
|--|------------------------------------------|---------------|-----|-------|-------|-------|-----|-------|-------|-------|
|  | Astrocytoma (Non-GBM) (WHO grade II-III) | Meta-analysis | 787 | 0.134 | 4,427 | 0.066 | 585 | 0.136 | 3,799 | 0.057 |
|  |                                          | GICC          | 494 | 0.142 | 1,868 | 0.059 | 400 | 0.133 | 1,397 | 0.051 |
|  |                                          | MDA-GWAS      | 155 | 0.131 | 1,094 | 0.070 | 88  | 0.141 | 1,142 | 0.059 |
|  | Oligodendroglioma (WHO grade II-III)     | Gliomascan    | 138 | 0.107 | 1,465 | 0.073 | 97  | 0.148 | 1,260 | 0.061 |
|  |                                          | Meta-analysis | 483 | 0.168 | 4,427 | 0.066 | 399 | 0.207 | 3,799 | 0.057 |
|  |                                          | GICC          | 310 | 0.168 | 1,868 | 0.059 | 266 | 0.224 | 1,397 | 0.051 |
|  |                                          | MDA-GWAS      | 95  | 0.196 | 1,094 | 0.070 | 54  | 0.146 | 1,142 | 0.059 |
|  |                                          | Gliomascan    | 78  | 0.132 | 1,465 | 0.073 | 79  | 0.194 | 1,260 | 0.061 |

**Supplemental Table 7. Info score, sex-specific odds ratios (OR), 95% confidence intervals (95% CI), and p values from meta-analysis and individual studies for rs11979158, rs55705857 and rs9841110 by specific non-GBM histologies.**

| RSID                    | Histology                                | Study                | Males             |                        |                          |                  | Females           |                        |                          |                  | Sex Difference        |                  |
|-------------------------|------------------------------------------|----------------------|-------------------|------------------------|--------------------------|------------------|-------------------|------------------------|--------------------------|------------------|-----------------------|------------------|
|                         |                                          |                      | Info <sub>M</sub> | P <sub>M</sub>         | OR <sub>M</sub> (95% CI) | P <sub>het</sub> | Info <sub>F</sub> | P <sub>F</sub>         | OR <sub>F</sub> (95% CI) | P <sub>het</sub> | P <sub>D</sub>        | P <sub>het</sub> |
| rs9841110<br>(3p21.31)  | Astrocytoma (Non-GBM) (WHO grade II-III) | <b>Meta-analysis</b> | --                | 0.5304                 | 1.04 (0.92-1.17)         | 0.7510           | --                | 0.0407                 | 1.15 (1.01-1.32)         | 0.549            | 0.2409                | 0.7420           |
|                         |                                          | GICC                 | 1.00              | 0.8819                 | 1.01 (0.87-1.18)         | --               | 1.00              | 0.3113                 | 1.09 (0.92-1.29)         | --               | 0.2594                |                  |
|                         |                                          | MDA-GWAS             | 1.00              | 0.3388                 | 1.14 (0.87-1.48)         | --               | 1.00              | 0.2454                 | 1.21 (0.88-1.68)         | --               | 0.3799                |                  |
|                         |                                          | Gliomascan           | 1.00              | 0.8658                 | 1.02 (0.78-1.34)         | --               | 1.00              | 0.0826                 | 1.32 (0.96-1.80)         | --               | 0.1134                |                  |
|                         | Oligodendroglioma (WHO grade II-III)     | <b>Meta-analysis</b> | --                | 0.4190                 | 0.94 (0.81-1.09)         | 0.6940           | --                | 0.0973                 | 1.14 (0.98-1.34)         | 0.36             | 0.0649                | 0.7530           |
|                         |                                          | GICC                 | 1.00              | 0.2508                 | 0.90 (0.74-1.08)         | --               | 1.00              | 0.4020                 | 1.09 (0.89-1.33)         |                  | 0.0812                |                  |
|                         |                                          | MDA-GWAS             | 1.00              | 0.8013                 | 1.04 (0.75-1.45)         | --               | 1.00              | 0.0500                 | 1.51 (1.00-2.27)         |                  | 0.0851                |                  |
|                         |                                          | Gliomascan           | 1.00              | 0.9752                 | 0.99 (0.70-1.41)         | --               | 1.00              | 0.6171                 | 1.09 (0.77-1.55)         |                  | 0.3544                |                  |
| rs11979158<br>(7p11.2)  | Astrocytoma (Non-GBM) (WHO grade II-III) | <b>Meta-analysis</b> | --                | 0.0023                 | 0.79 (0.68-0.92)         | 0.0560           | --                | 0.9363                 | 0.99 (0.83-1.18)         | 0.418            | 0.0500                | 0.0620           |
|                         |                                          | GICC                 | 1.00              | 3.90x10 <sup>-4</sup>  | 0.70 (0.58-0.85)         | --               | 1.00              | 0.9938                 | 1.00 (0.80-1.25)         |                  | 0.0093                |                  |
|                         |                                          | MDA-GWAS             | 1.00              | 0.1640                 | 0.80 (0.58-1.10)         | --               | 1.00              | 0.3965                 | 1.19 (0.80-1.78)         |                  | 0.0630                |                  |
|                         |                                          | Gliomascan           | 1.00              | 0.4710                 | 1.13 (0.81-1.59)         | --               | 1.00              | 0.3097                 | 0.82 (0.55-1.21)         |                  | 0.1075                |                  |
|                         | Oligodendroglioma (WHO grade II-III)     | <b>Meta-analysis</b> | --                | 0.0221                 | 0.81 (0.68-0.97)         | 0.8650           | --                | 0.6561                 | 1.05 (0.86-1.28)         | 0.262            | 0.0471                | 0.6470           |
|                         |                                          | GICC                 | 1.00              | 0.0475                 | 0.79 (0.63-1.00)         | --               | 1.00              | 0.6237                 | 1.07 (0.83-1.37)         |                  | 0.0450                |                  |
|                         |                                          | MDA-GWAS             | 1.00              | 0.5593                 | 0.89 (0.60-1.32)         | --               | 1.00              | 0.1941                 | 1.40 (0.84-2.33)         |                  | 0.0830                |                  |
|                         |                                          | Gliomascan           | 1.00              | 0.2618                 | 0.78 (0.50-1.21)         | --               | 1.00              | 0.3297                 | 0.81 (0.53-1.24)         |                  | 0.4496                |                  |
| rs55705857<br>(8q24.21) | Astrocytoma (Non-GBM) (WHO grade II-III) | <b>Meta-analysis</b> | --                | 1.19x10 <sup>-21</sup> | 2.87 (2.31-3.56)         | 0.0730           | --                | 2.15x10 <sup>-28</sup> | 4.64 (3.53-6.09)         | 0.237            | 0.0065                | 0.0370           |
|                         |                                          | GICC                 | 1.00              | 1.72x10 <sup>-18</sup> | 3.34 (2.55-4.36)         | --               | 1.00              | 2.75x10 <sup>-17</sup> | 4.01 (2.91-5.53)         |                  | 0.1947                |                  |
|                         |                                          | MDA-GWAS             | 0.78              | 6.98x10 <sup>-5</sup>  | 2.77 (1.68-4.58)         | --               | 0.75              | 3.76x10 <sup>-7</sup>  | 7.38 (3.41-15.96)        |                  | 0.0185                |                  |
|                         |                                          | Gliomascan           | 0.80              | 0.0509                 | 1.68 (1.00-2.83)         | --               | 0.80              | 1.42x10 <sup>-7</sup>  | 6.19 (3.14-12.22)        |                  | 0.0014                |                  |
|                         | Oligodendroglioma (WHO grade II-III)     | <b>Meta-analysis</b> | --                | 5.37x10 <sup>-34</sup> | 5.47 (4.16-7.19)         | 0.1030           | --                | 3.68x10 <sup>-58</sup> | 12.15 (8.96-16.48)       | 0.027            | 6.60x10 <sup>-5</sup> | 0.0070           |
|                         |                                          | GICC                 | 1.00              | 2.94x10 <sup>-23</sup> | 5.49 (3.92-7.68)         | --               | 1.00              | 3.10x10 <sup>-40</sup> | 10.24 (7.26-14.43)       |                  | 0.0054                |                  |
|                         |                                          | MDA-GWAS             | 0.79              | 1.88x10 <sup>-11</sup> | 8.41 (4.52-15.66)        | --               | 0.75              | 3.97x10 <sup>-6</sup>  | 11.57 (4.09-32.74)       |                  | 0.3031                |                  |
|                         |                                          | Gliomascan           | 0.79              | 0.0035                 | 2.96 (1.43-6.15)         | --               | 0.79              | 1.53x10 <sup>-16</sup> | 36.02 (15.38-84.37)      |                  | 6.35x10 <sup>-6</sup> |                  |

Abbreviations: GICC: Glioma International Case-Control Study; SFAGS-GWAS: San Francisco Adult Glioma Study GWAS; MDA-GWAS: MD Anderson GWAS

Supplemental Figure 1. P values of SNPs between 48.8mb and 50mb on chromosome 3 in males for A) all glioma, B) GBM, and C) non-GBM, and in females for D) all glioma, E) GBM, and F) non-GBM

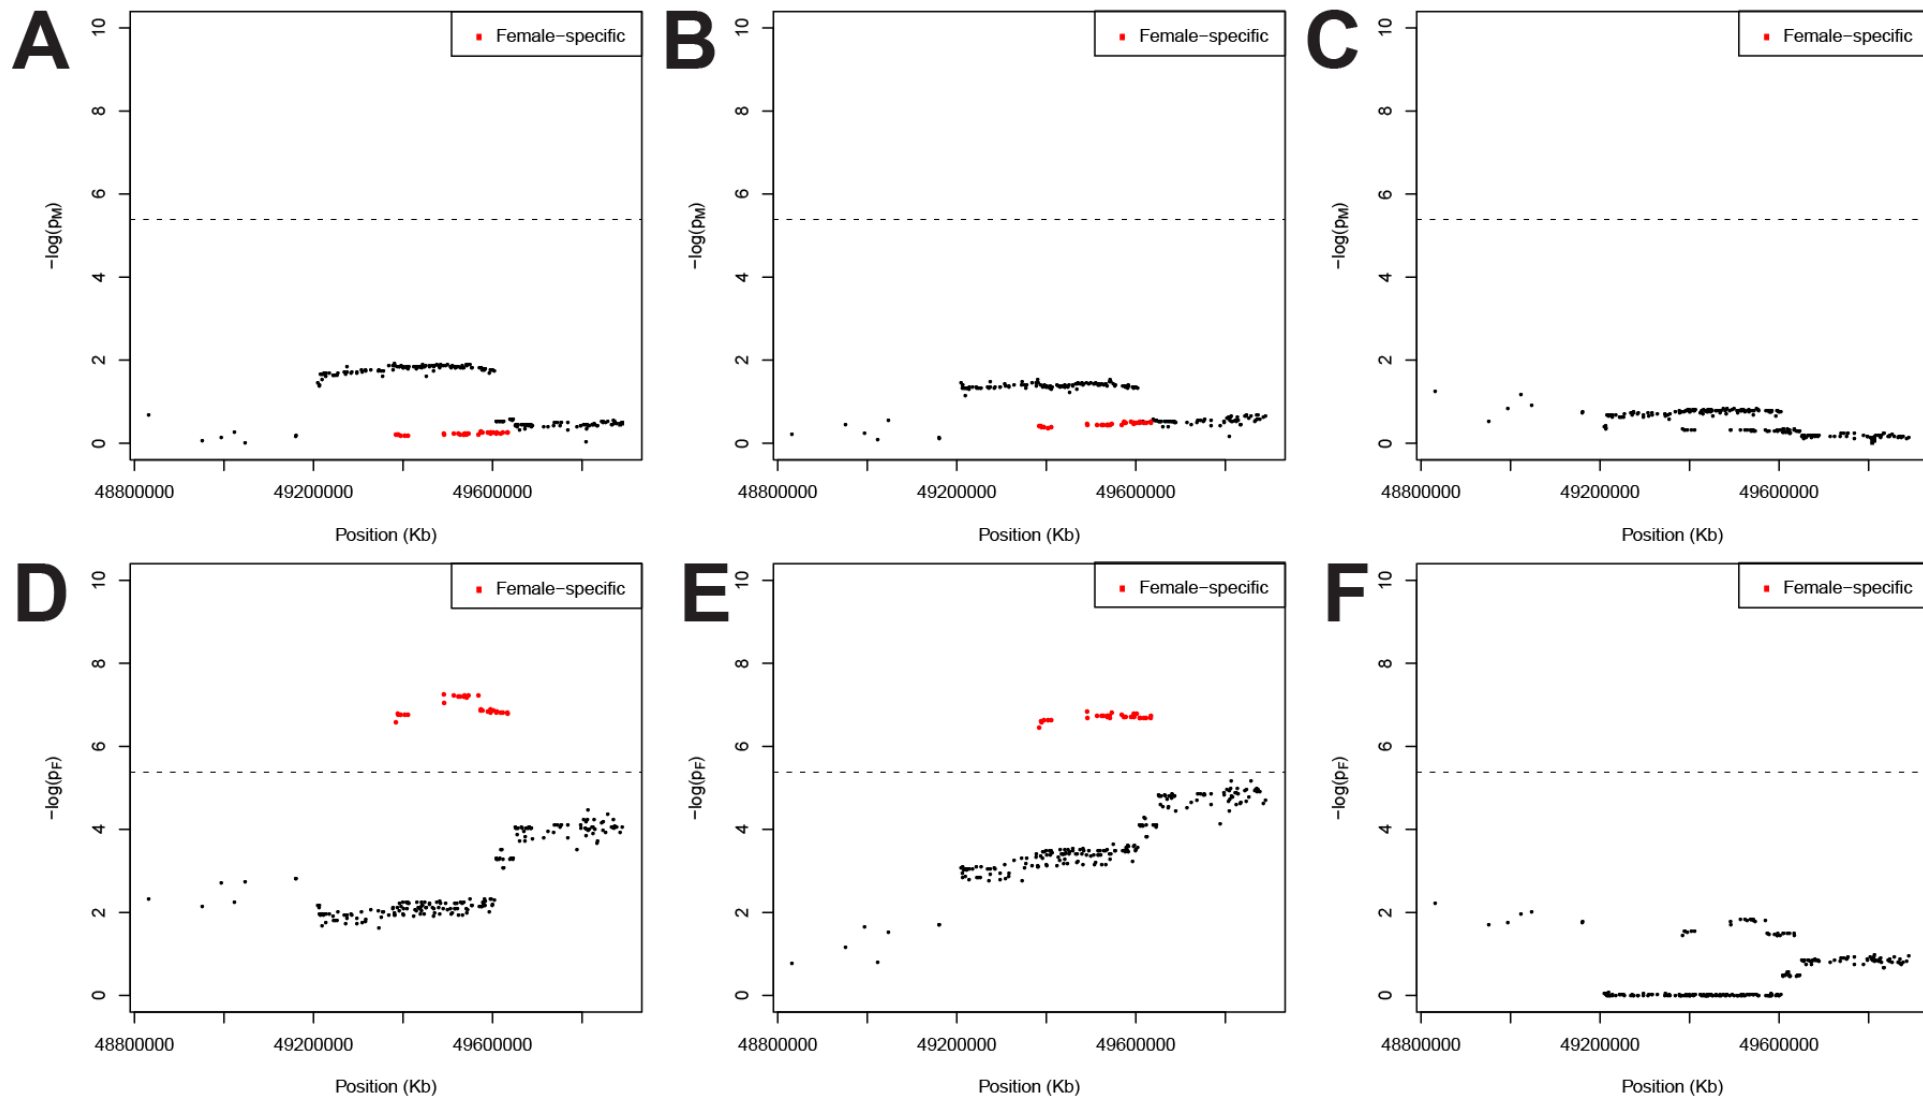

Supplemental Figure 2. Proportion of samples with *IDH1/2* mutation in the TCGA GBM and LGG datasets by sex, A) overall and B) stratified by study

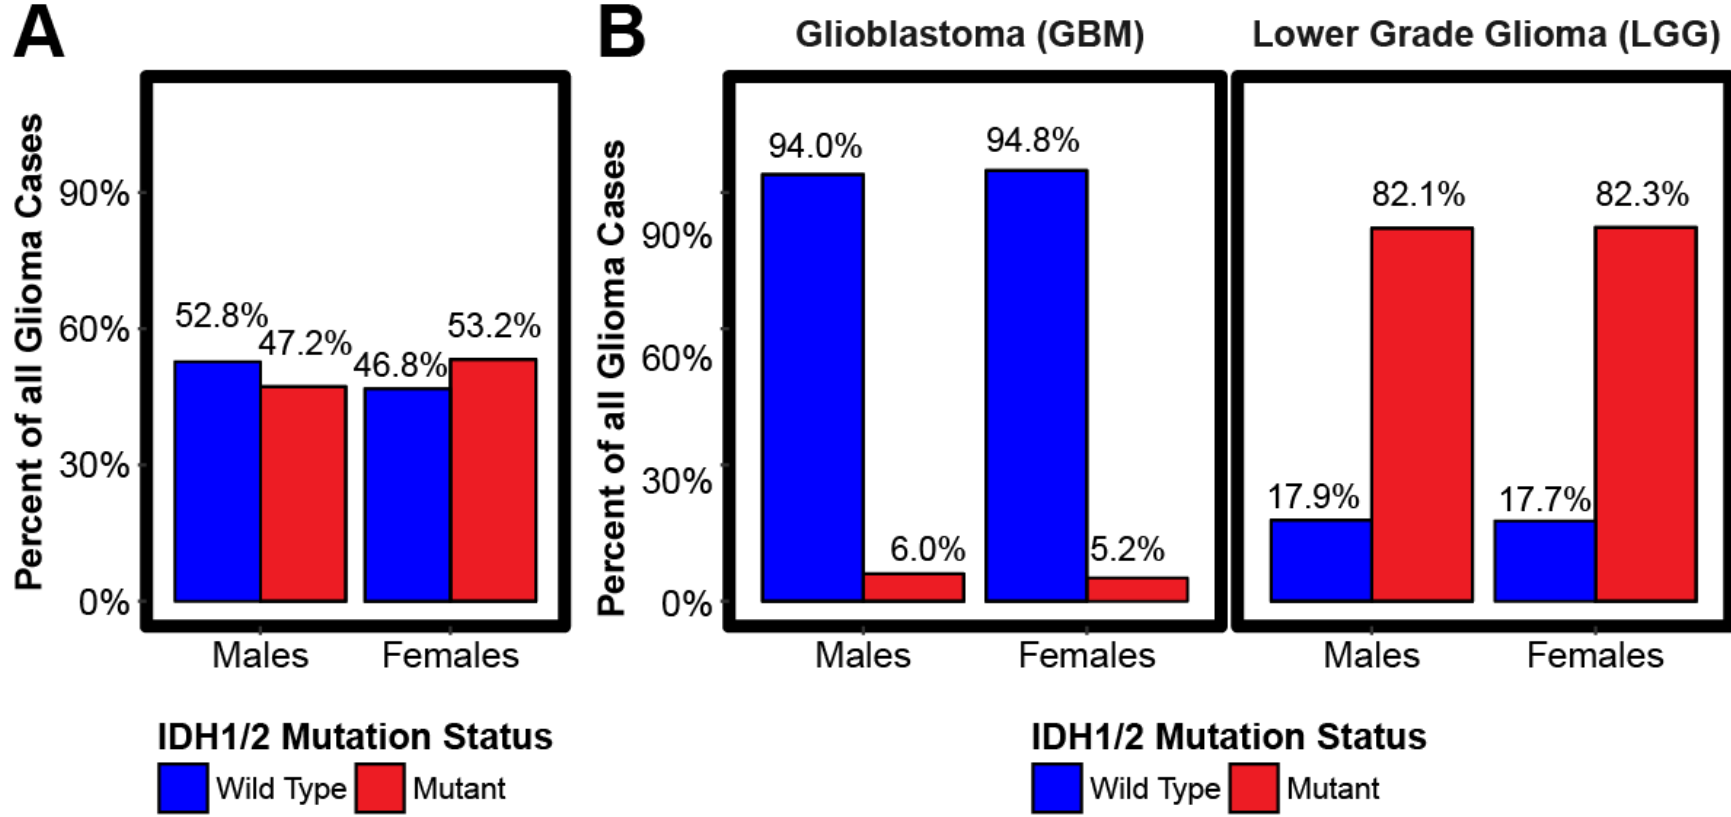

Supplemental Figure 3. Proportion of samples by glioma subtype (based on *IDH1/2* mutation, 1p19q, and TERT mutation) in the TCGA GBM and LGG datasets by sex, A) overall and B) stratified by study

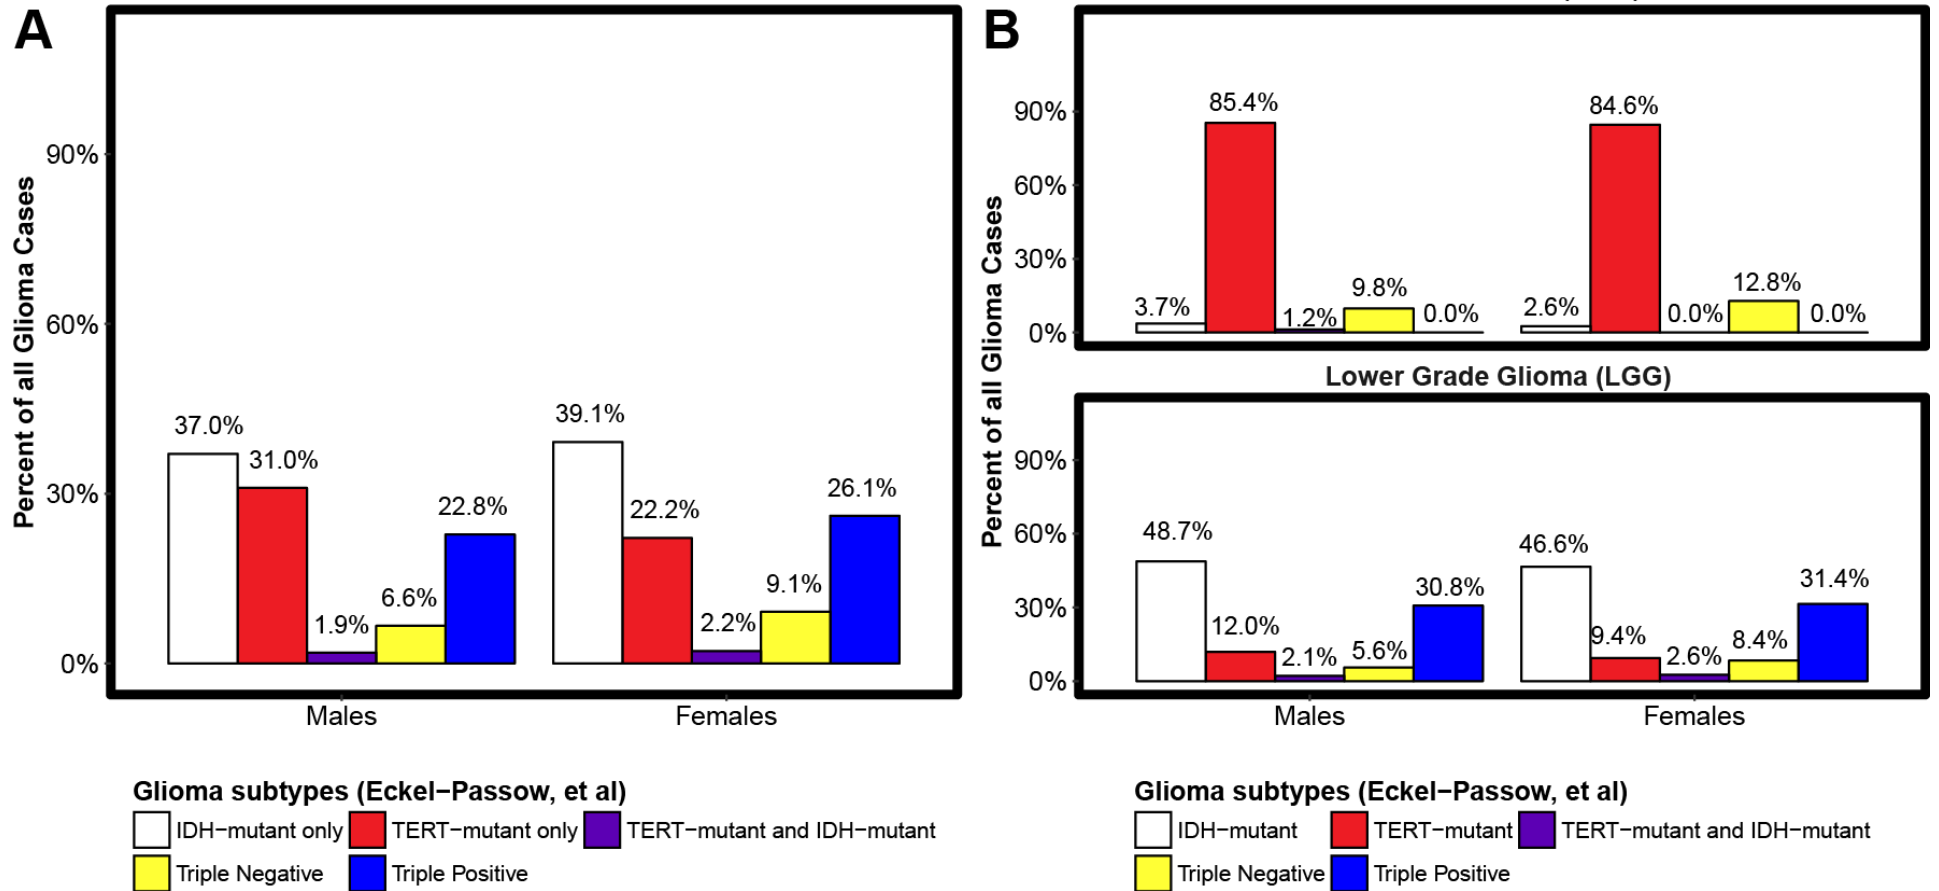

Supplemental Figure 4. Proportion of samples by pan-glioma methylation subgroups in the TCGA GBM and LGG datasets by sex, A) overall and B) stratified by study

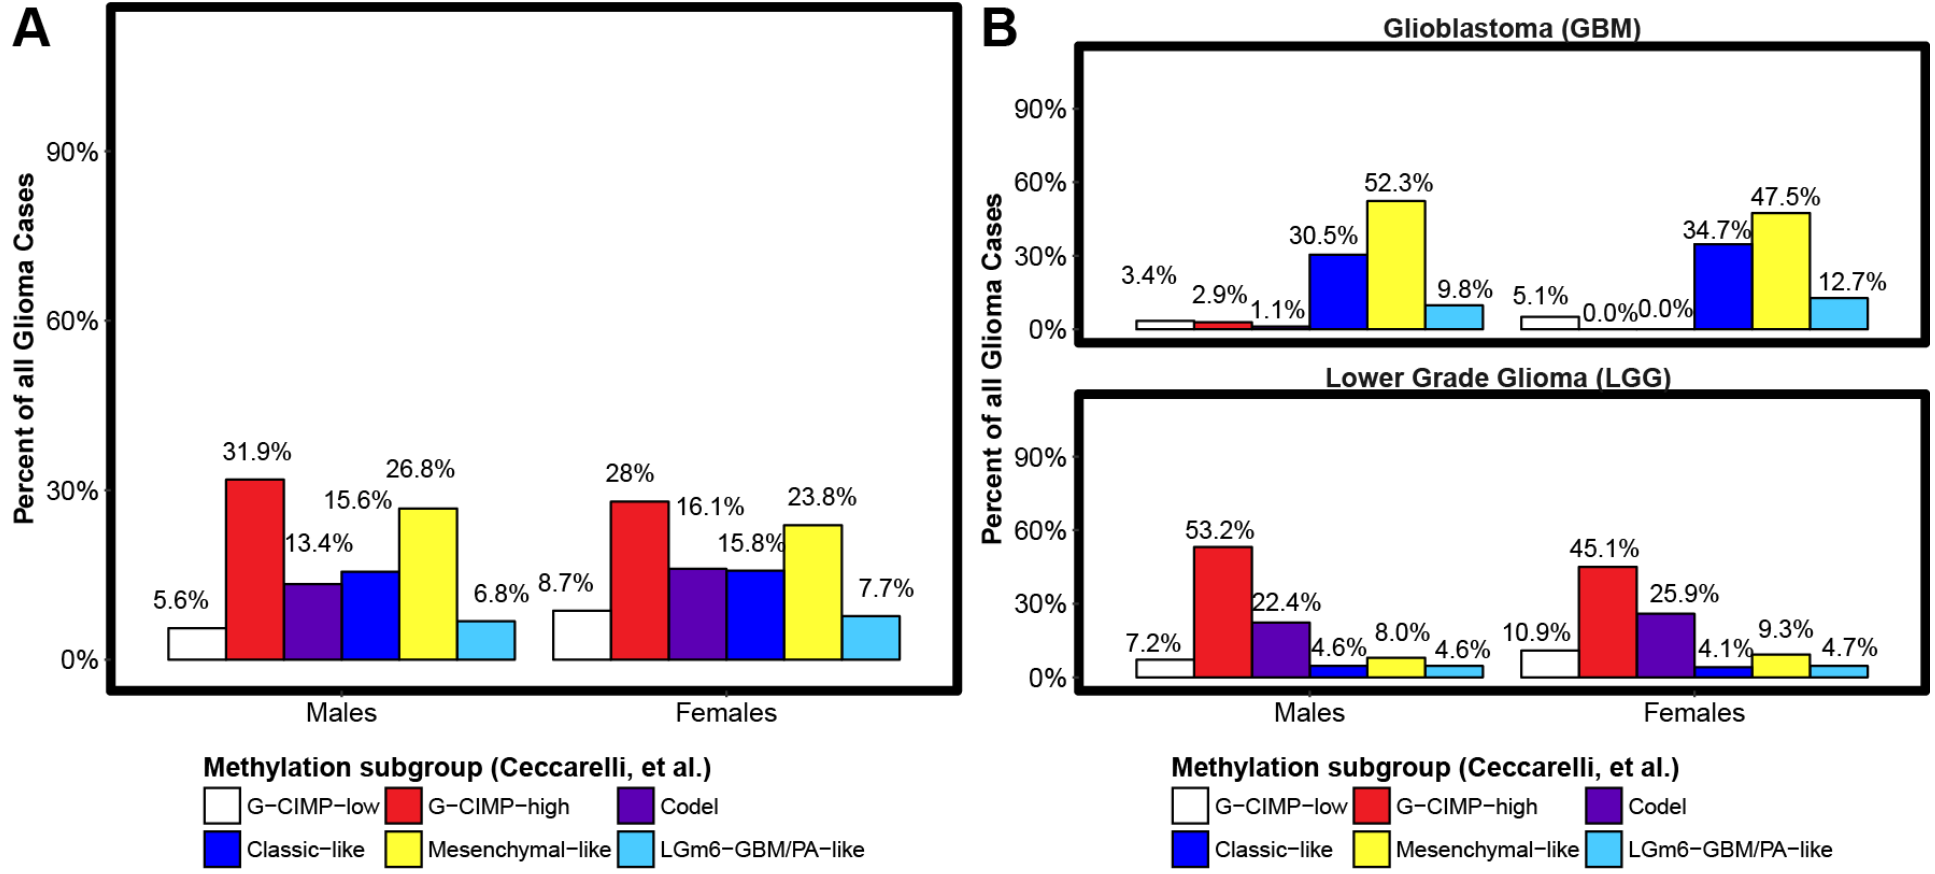

Supplemental Figure 5. Density of histology-specific unweighted risk score by sex and case/control status for A) URS in all glioma, B) URS in GBM, C) URS in non-GBM, D) URS-GBM in GBM, only and E) URS-NGBM in non-GBM only

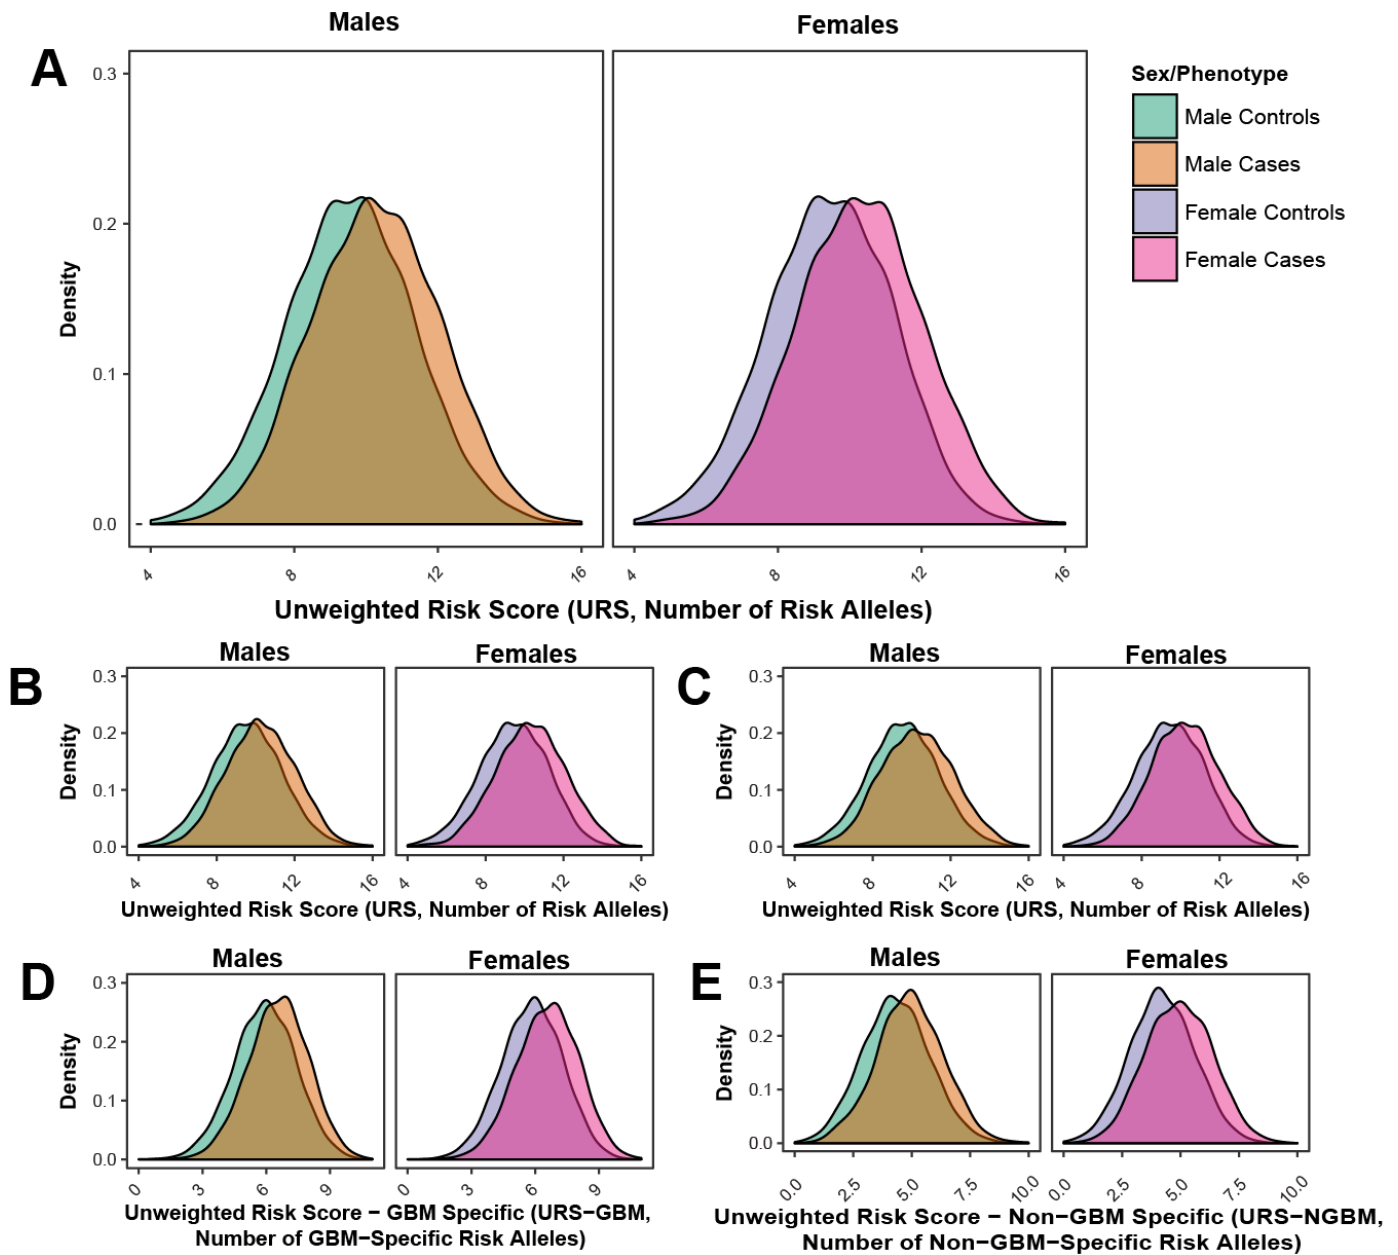



Supplemental Figure 6. Sex-specific odds ratios and 95% CI from meta-analysis and by study for rs11979158 (7p11.2) for all glioma, GBM, and non-GBM

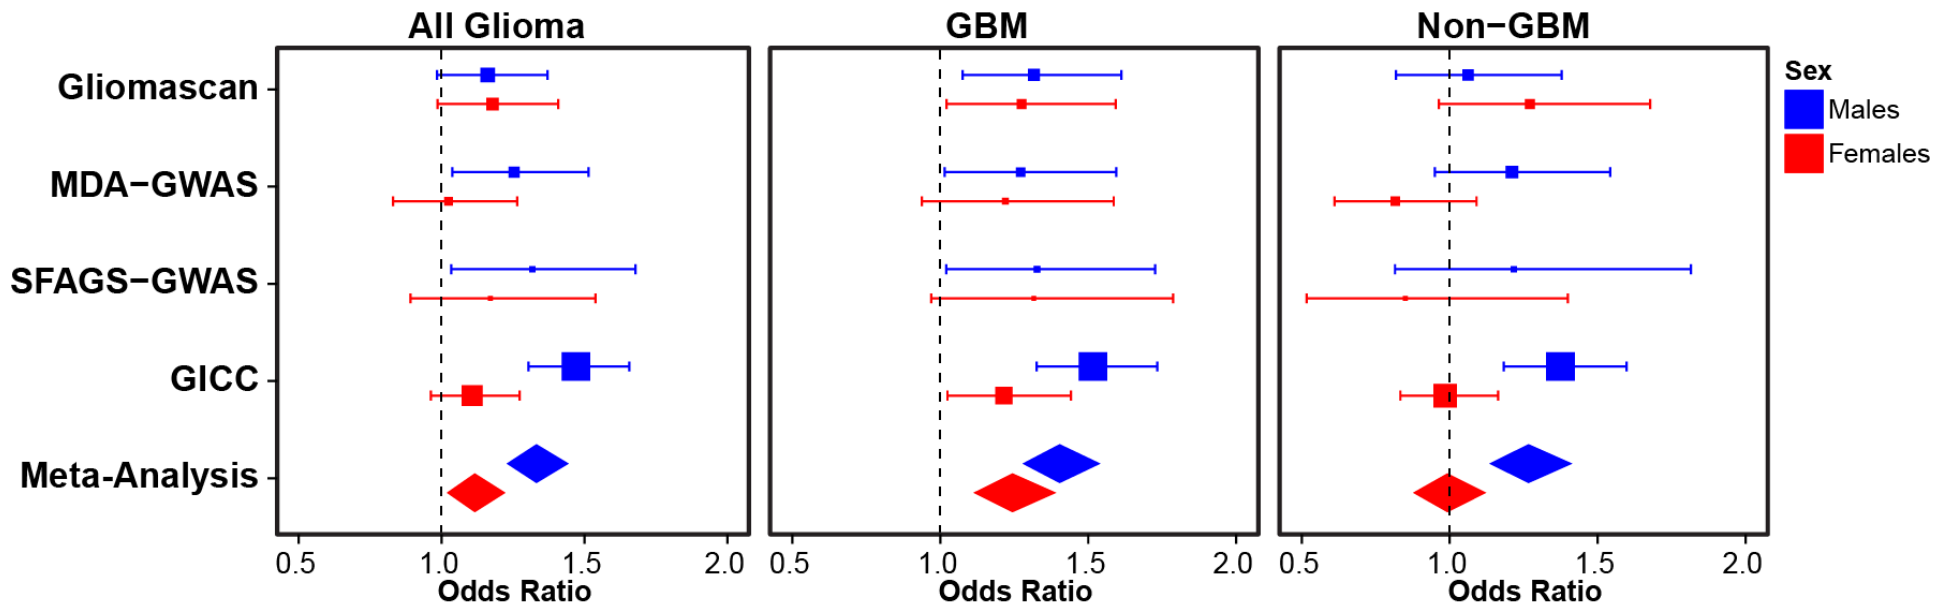

Supplemental Figure 7. Sex-specific odds ratios and 95% CI from meta-analysis and by study for rs55705857 (8q24.21) for all glioma, GBM, and non-GBM

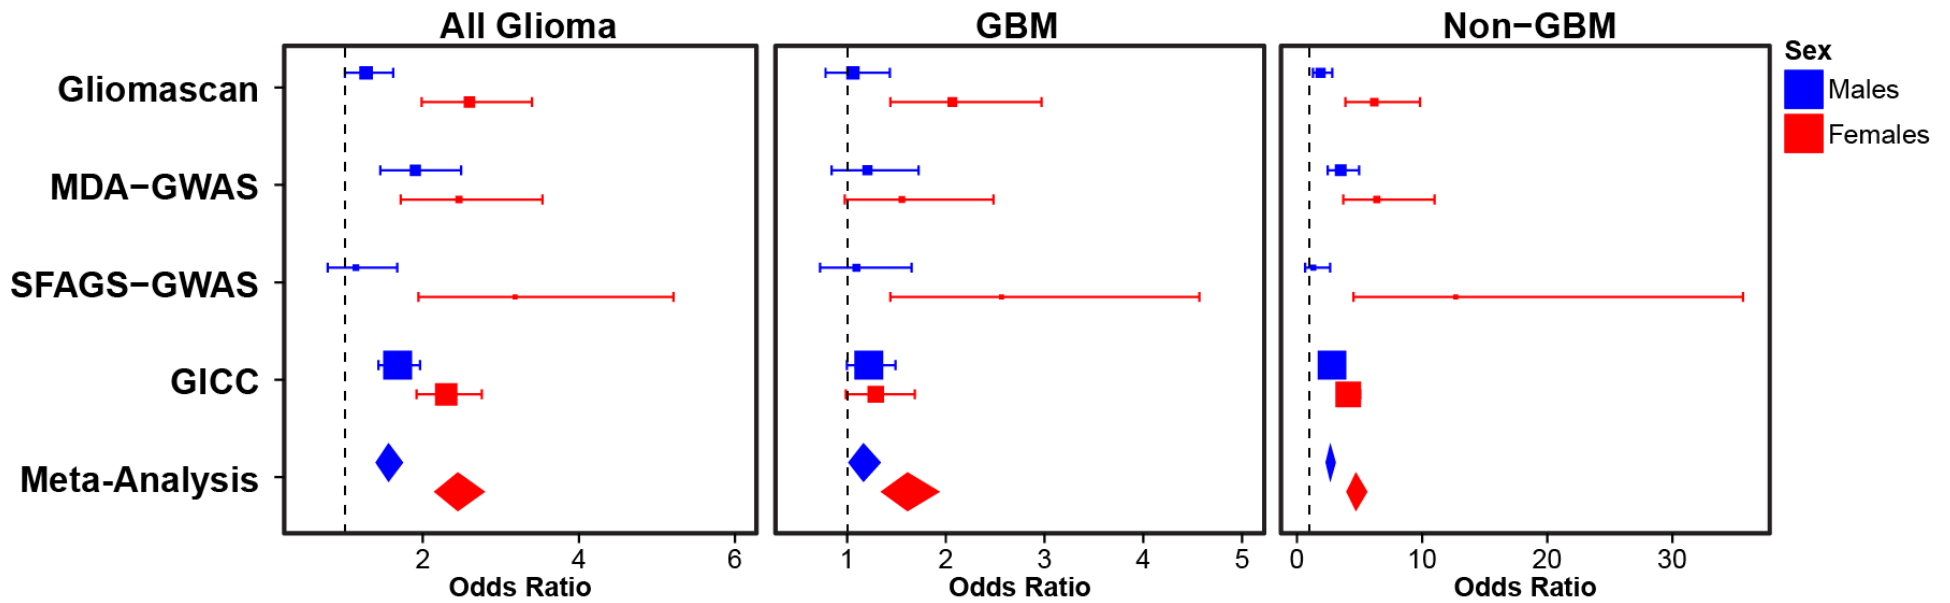

Supplemental Figure 8. Sex-specific odds ratios and 95% CI from meta-analysis and by study for rs9841110 (3p21.31) for all glioma, GBM, and non-GBM

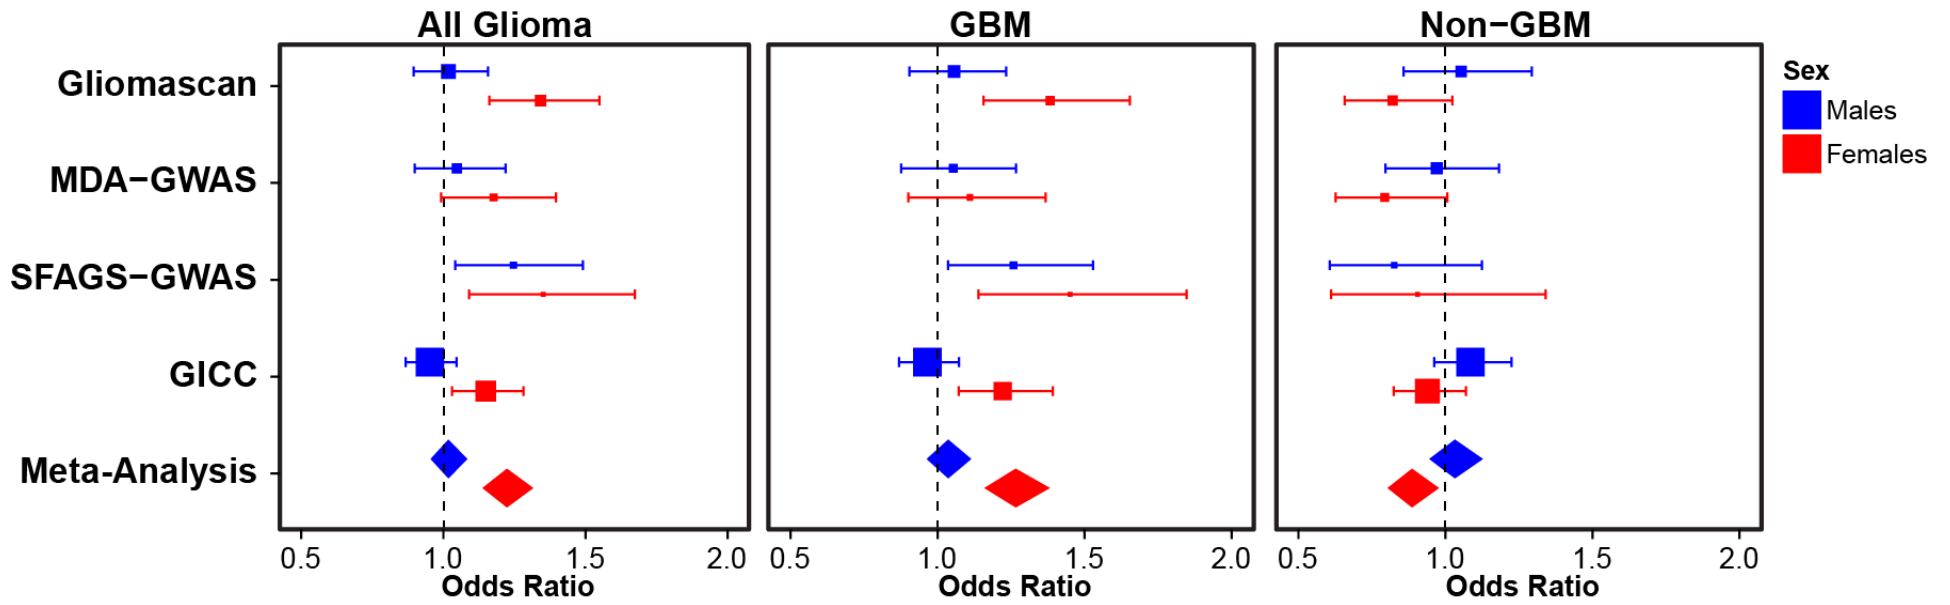

Supplement: 41598_2018_24580_MOESM1_ESM.pdf [file 41598_2018_24580_MOESM1_ESM.pdf]
